# Supplementary material for: Molecular and Immunohistochemical Expression of LTA4H and FXR1 in Canine Oral Melanoma
Source: Frontiers journal article supplement (doi:10.3389/fvets.2021.767887), 2021-12-13
Supplement: Data_Sheet_2.PDF [file Data_Sheet_2.PDF]

Figure S1: Canine tissues, immunohistochemistry, AEC chromogen. A) Anti- FXR1 staining, positive control: diffuse intense cytoplasmic signal of muscle fibers. Bar 50  $\mu$ m. B) Anti-LTA4H staining, diffuse nuclear positive staining of neutrophils on the surface of an ulcerated tumor. Bar 50  $\mu$ m.

Figure S2: Canine oral melanoma, immunohistochemistry, AEC chromogen. A) Anti- FXR1 staining, negative control. Bar 50  $\mu$ m. B) Anti-LTA4H staining, negative control. Bar 50  $\mu$ m.

Figure S3: Canine tissues, immunohistochemistry, AEC chromogen. A) Canine oral melanoma: Anti-KI67 staining, intense, diffuse nuclear positive staining of neoplastic cells. Bar 50  $\mu$ m. B) Canine intestine (puppy): Anti- KI67 staining, positive control. Intense, diffuse nuclear positive staining of epithelial cells. Bar 50  $\mu$ m.

Figure S4: Canine oral melanoma, immunohistochemistry, AEC chromogen. A) Anti- PNL2 staining, diffuse, intense cytoplasmic staining control. Bar 50  $\mu$ m. B) Anti-LTA4H staining, negative control. Bar 50  $\mu$ m.
